# Supplementary material for: Layer-by-Layer Combination of MWCNTs and Poly(ferulic acid) as Electrochemical Platform for Hesperidin Quantification
Source: MDPI journal article supplement (doi:10.3390/bios13050500), 2023-04-25
Supplement: s1 [file s1]

# Layer-by-Layer Combination of MWCNTs and Poly(Ferulic Acid) as Electrochemical Platform for Hesperidin Quantification

Elvira Yakupova <sup>1,2</sup>, Aisylu Mukharlyamova <sup>2</sup>, Igor Fitsev <sup>2</sup> and Guzel Ziyatdinova <sup>1,\*</sup>

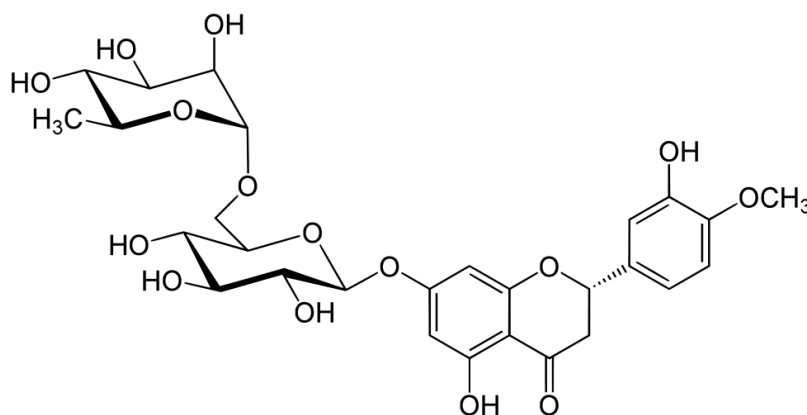

Figure S1. Hesperidin structure.

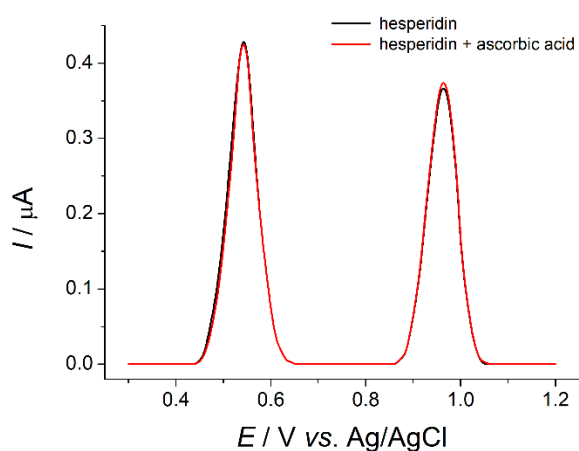

(a)

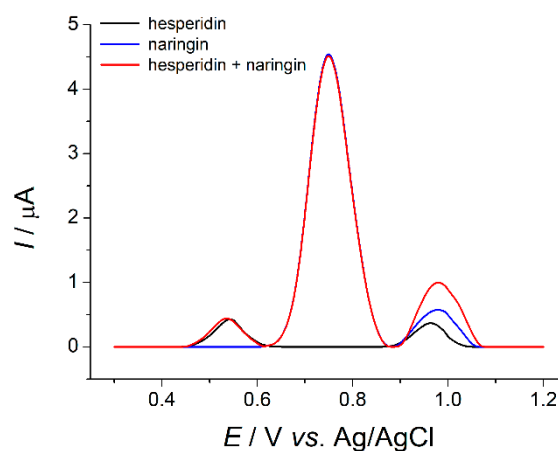

(b)

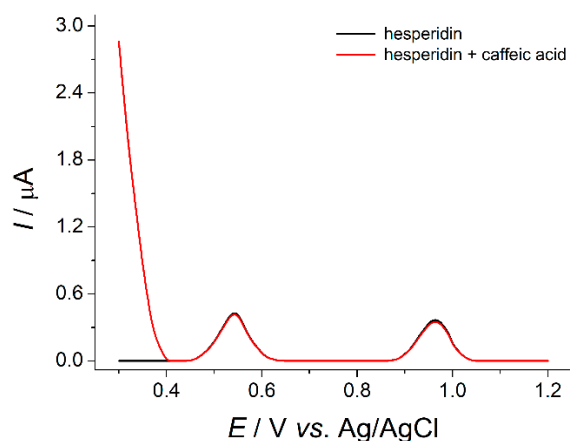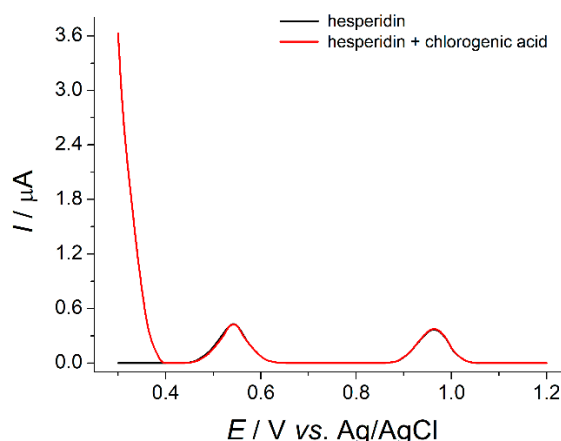

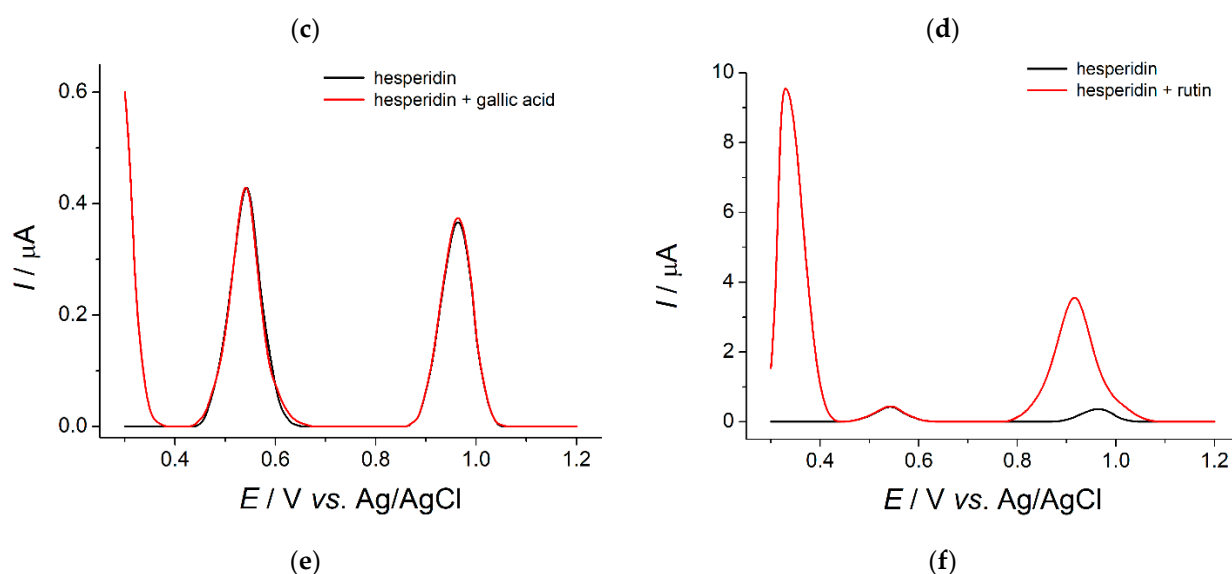

**Figure S2.** Differential pulse voltammograms with baseline correction for the mixtures of hesperidin with potential interferences on polyFA/MWCNTs/GCE in phosphate buffer pH 5.5: (a)  $1.0 \mu\text{mol L}^{-1}$  of hesperidin and  $100 \mu\text{mol L}^{-1}$  of ascorbic acid; (b)  $1.0 \mu\text{mol L}^{-1}$  of hesperidin and  $100 \mu\text{mol L}^{-1}$  of naringin; (c)  $1.0 \mu\text{mol L}^{-1}$  of hesperidin and  $100 \mu\text{mol L}^{-1}$  of caffeic acid; (d)  $1.0 \mu\text{mol L}^{-1}$  of hesperidin and  $100 \mu\text{mol L}^{-1}$  of chlorogenic acid; (e)  $1.0 \mu\text{mol L}^{-1}$  of hesperidin and  $10 \mu\text{mol L}^{-1}$  of gallic acid; (f)  $1.0 \mu\text{mol L}^{-1}$  of hesperidin and  $5 \mu\text{mol L}^{-1}$  of rutin.  $\Delta E_{\text{pulse}} = 0.100 \text{ V}$ ,  $t_{\text{pulse}} = 0.025 \text{ s}$ ,  $v = 20 \text{ mV s}^{-1}$ .

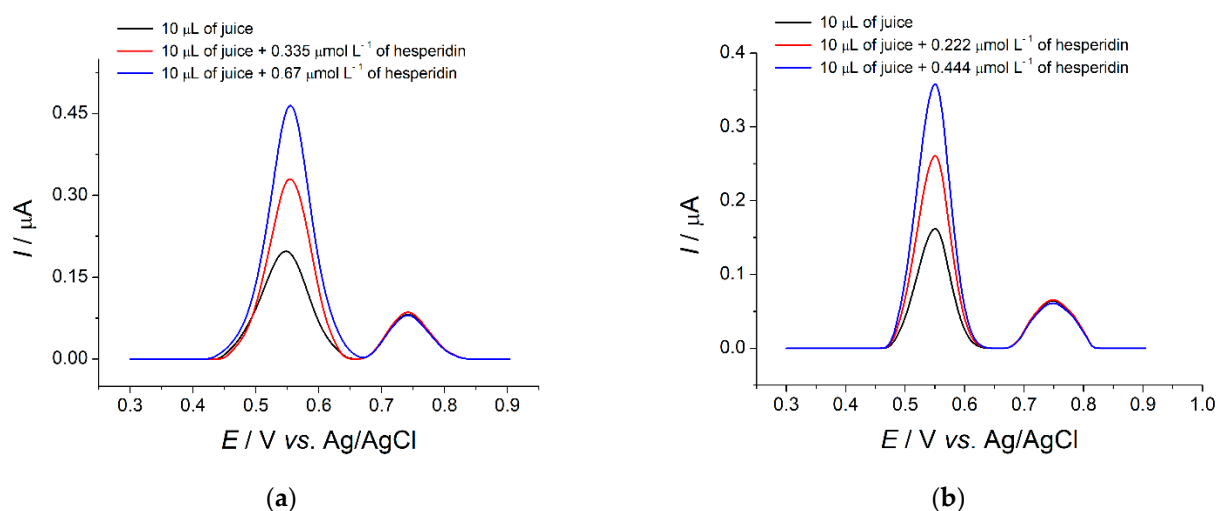

**Figure S3.** Typical differential pulse voltammograms with baseline correction for orange juices on polyFA/MWCNTs/GCE in phosphate buffer pH 5.5: (a)  $10 \mu\text{L}$  of commercial juice with various additions of hesperidin; (b)  $10 \mu\text{L}$  of orange fresh with various additions of hesperidin.  $\Delta E_{\text{pulse}} = 0.100 \text{ V}$ ,  $t_{\text{pulse}} = 0.025 \text{ s}$ ,  $v = 20 \text{ mV s}^{-1}$ .

**Table S1.** Recovery of hesperidin in orange juices ( $n = 5$ ;  $p = 0.95$ ).

| Sample       | Spiked ( $\mu\text{mol L}^{-1}$ ) | Found ( $\mu\text{mol L}^{-1}$ ) | RSD (%) | Recovery (%)    |
|--------------|-----------------------------------|----------------------------------|---------|-----------------|
| Orange fresh | 0                                 | $0.352 \pm 0.008$                | 1.5     |                 |
|              | 0.222                             | $0.572 \pm 0.009$                | 1.2     | $99.7 \pm 1.5$  |
|              | 0.444                             | $0.794 \pm 0.009$                | 0.92    | $99.7 \pm 1.1$  |
| entry 3      | 0                                 | $0.432 \pm 0.008$                | 1.2     |                 |
|              | 0.335                             | $0.77 \pm 0.01$                  | 1.2     | $100.4 \pm 1.3$ |
|              | 0.670                             | $1.10 \pm 0.06$                  | 2.3     | $100.2 \pm 2.0$ |
